# Supplementary material for: Enhanced electrochromic performance of composite films by combination of polyoxometalate with poly(3,4-ethylenedioxythiophene)
Source: Royal Society of Chemistry journal article supplement (doi:10.1039/c0jm02412k), 2010-12-01
Supplement: c0jm02412k.pdf [file c0jm02412k.pdf]

**Dual-function composite film with enhanced electrochromism and supercapacitor performances by combination of polyoxometalate with poly(3,4-ethylenedioxythiophene)**

**Supplementary Information**

**Figure Captions**

**Fig. S1** CV curves of  $[\text{P}_2\text{W}_{18}\text{-PAH}]_{10}$  and  $[\text{PEDOT}]_{10}$  films at a scan rate of  $25 \text{ mV s}^{-1}$ .

**Fig. S2** The relationship between peak potentials of last redox peaks of the  $[\text{P}_2\text{W}_{18}\text{-PEDOT}]_{20}$  film and pH.

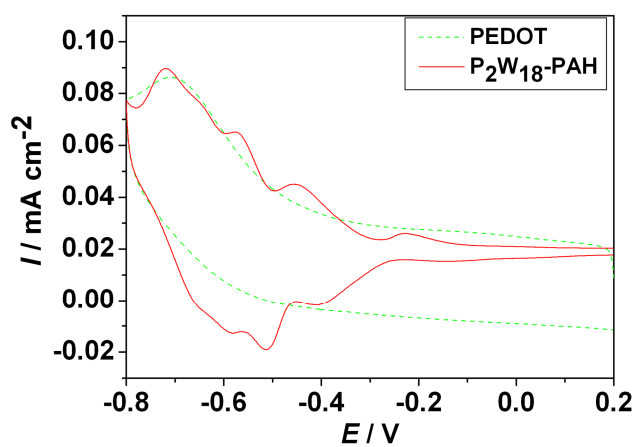

Fig. S1

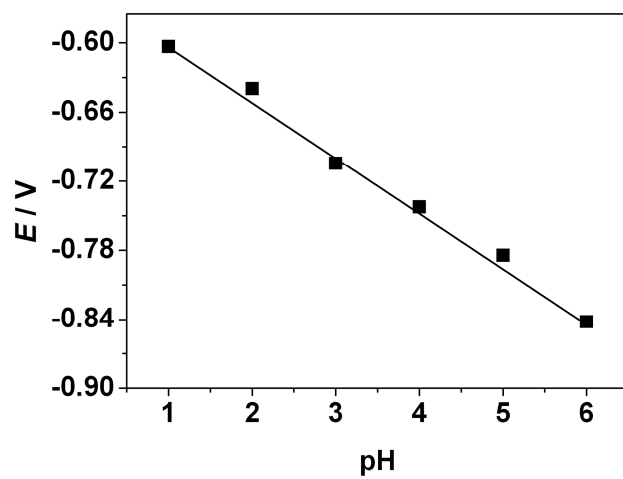

Fig. S2
